# Supplementary material
Source: HighWire-hosted journal article supplement (https://www.annfammed.org/highwire/filestream/8190/field_highwire_adjunct_files/0/Street_Supp_T.pdf)
Supplement: Street_Supp_T.pdf [file Street_Supp_T.pdf]

Online Supplementary Material

Street RL, O'Malley K, Haidet P, Cooper LA. Understanding concordance in patient-physician relationships: personal and ethnic dimensions of shared identity. *Ann Fam Med*. 2008;6(3):198-205.

<http://www.annfammed.org/cgi/content/full/6/3/198/DC1>

**Supplemental Table. Items for the Patient Participation and Physician Patient-Centered Communication Measures**

**A. Items assessing patients' participation in the encounter**

1. The patient asked the doctors to explain the treatments and procedures in greater detail
2. The patient asked the doctor for recommendations for treatment
3. The patient asked the doctors a lot of questions about his/her options for treatment
4. The patient let the doctors know what he/she liked and disliked about the treatment options
5. The patient told the doctor which form of treatment the patient preferred
6. The patient felt free to express any concerns and worries the patient might have about treatment
7. The patient expressed his/her opinion about treatment

**B. Items assessing physicians' patient-centered communication**

1. The doctor did not fully discuss with the patient what was causing the patient's problem
2. The doctor showed a genuine interest in the patient's health
3. The doctor encouraged the patient to express concerns and worries
4. The doctor made the patient feel completely at ease during the consultation
5. The doctor did not treat the patient as an equal in this consultation
6. The doctor thoroughly explained everything to the patient
7. The doctor asked for the patient's opinion about what to do about his/her condition
8. The doctor was very informative about the patient health
9. The doctor asked for the patient's thoughts about his/her health
10. The doctor's explanations and recommendations were clear and easy to understand
11. The doctor tried to reassure and comfort the patient
12. The doctor seemed to care about the patient's feelings

Note: Coders rated physicians' and patients' communication on these items using 5-point Likert scales.
